# Supplementary material for: Multiple origins and modularity in the spatiotemporal emergence of cerebellar astrocyte heterogeneity
Source: PLoS Biol. 2018 Sep 27;16(9):e2005513. doi: 10.1371/journal.pbio.2005513 (PMC6178385; doi:10.1371/journal.pbio.2005513)
Supplement: S1 Data — (XLSX) [file pbio.2005513.s021.xlsx]

## Sheet: Figure 3A
Size of StarTrack P30 clones
	All clones E12	All clones E14	HomCs E12	HomCs E14	HetCs E12	Hetcs E14
	1	1	2	1	8	10
	2	1	1	1	6	3
	1	2	4	2	30	7
	4	5	2	5	40	5
	1	2	1	2	22	6
	1	4	1	4	17	12
	8	2	1	2	12	25
	2	1	1	1	14	91
	1	1	2	1	3	16
	3	5	1	5	69	40
	1	1	2	1	33	16
	6	1	1	1	7	6
	2	1	2	1	11	74
	3	3	4	3	10	4
	3	1	1	1	40	13
	30	2	2	2	34	16
	1	2	1	2	40	5
	40	7	1	1	14	13
	22	10	2	1	9	26
	2	3	1	3	4	14
	17	2	1	1	43	7
	6	12	2	4	5	18
	12	1	1	1	22
	14	1	3	1	43
	5	3	1	3	14
	7	1	1	2	31
	2	4	1	3	60
	1	5	1	1	21
	3	6	3	1	50
	1	3	1	3	18
	69	1	2	1	18
	1	1	2	1	8
	33	3	1	1	9
	1	2	2	3	8
	10	3	1	1	59
	2	1	1	3	4
	2	1	1	4	35
	7	3	2	1	23
	1	1	1	1	48
	1	1	1	4	131
	1	1	2	1	58
	1	3	6	1	6
	1	1	13	1	46
	1	3	2	2	70
	2	4	1	4	101
	3	12	1	2	6
	1	25	1	1	4
	1	91	1	1	11
	1	16	1	2	31
	1	40	2	2	107
	1	16	2	1	5
	1	6	2	2	20
	2	74	3	2	61
	1	4	2	2	12
	11	13	2	1	8
	10	16	1	1	10
	6	5	7	4	18
	2	13	2	1	3
	11	26	1	1	23
	1	14	21	2	67
	40	26	1	1	4
	2	1	3	3	120
	1	1	2	1	36
	5	4	1	1	5
	1	1	10	1	3
	5	1	1	4	5
	1	1	1	1	20
	1	2	1	2	19
	34	4	1	1	14
	5	2	2	1	4
	3	1	1		44
	31	1	2		15
	1	2	8		5
	44	2	1		61
	40	1	1		11
	5	2	2		54
	14	2	1		5
	1	2	2		5
	9	1	2		17
	1	1	2		43
	4	4	2		7
	1	1	1		20
	2	1	1		6
	2	2	1		5
	1	1	1		2
	43	3	6		134
	1	1	1		8
	5	1	2		9
	1	1	1		69
	1	4	1		2
	22	1	2		9
	2	2	1		67
	1	1	1		34
	2	1	4		3
	1	1	1
	43	3	7
	4	1	1
	2	1	1
	3	7	2
	1	18	1
	14	2	1
	2	2	1
	2		2
	31		1
	2		1
	60		5
	21		1
	50		1
	2		1
	18		3
	2		2
	2		2
	18		1
	1		1
	1		1
	2		2
	2		1
	8		1
	4		2
	1		2
	9		1
	6		2
	2		1
	13		4
	21		1
	3		5
	1		2
	2		5
	1		7
	8		1
	1		3
	59		5
	1		2
	4		2
	6		2
	3		1
	1		3
	1		1
	1		3
	2		1
	104		5
	1		2
	1		2
	35		1
	23		1
	48		1
	1		1
	131		7
	2		1
	2		1
	58		1
	1		1
	6		2
	1
	1
	1
	2
	2
	1
	46
	1
	1
	2
	2
	2
	1
	70
	5
	2
	2
	101
	2
	6
	11
	4
	2
	11
	1
	7
	1
	31
	4
	2
	2
	107
	1
	1
	3
	5
	2
	4
	20
	61
	12
	8
	10
	18
	3
	23
	1
	67
	4
	1
	120
	36
	5
	3
	8
	2
	5
	20
	3
	19
	14
	4
	44
	15
	5
	8
	61
	91
	2
	2
	11
	54
	69
	2
	5
	5
	17
	2
	2
	2
	1
	43
	7
	1
	20
	1
	6
	5
	47
	2
	1
	5
	1
	1
	4
	5
	2
	7
	2
	7
	1
	1
	134
	1
	1
	4
	8
	4
	1
	9
	1
	1
	3
	2
	69
	1
	2
	9
	37
	2
	1
	2
	67
	1
	1
	3
	2
	34
	3
	1
	1
mean	12.1972	5.98039	2.14379	1.85714	27.7128	19.4091
std deviation	22.4163	12.7077	2.37979	1.1457	29.2878	22.345
SEM	1.33016	1.25825	0.192395	0.136937	3.02081	4.76398

## Sheet: Figure 3B
Size of StarTrack P30 HetCs
	BG+GLA+WMA clones E12	BG+GLA+WMA clones E14	BG+GLA clones E12	BG+GLA clones E14
	8	7	6	10
	40	12	30	3
	17	25	22	5
	12	91	3	6
	14	16	7	16
	69	40	11	6
	33	7	40	74
	10	18	9	4
	34		4	13
	40		43	16
	14		5	5
	22		43	13
	14		8	26
	31		4	14
	60		58
	21		46
	50		101
	18		6
	18		11
	9		5
	8		12
	59		8
	35		18
	23		3
	48		4
	131		5
	6		3
	70		5
	4		20
	31		5
	107		61
	20		11
	61		5
	10		5
	23		17
	67		7
	120		20
	36		6
	19		2
	14		8
	4		9
	44		2
	15		9
	54		3
	43
	5
	134
	69
	34
	67
mean	37.9	27	16.1364	15.0714
std deviation	32.3351	28.0204	20.1478	18.1127
SEM	4.57288	9.90671	3.0374	4.84083

## Sheet: Figure 3C
Contribution of astrocyte types to E12-P30 HetCs
	Triple clones			Double clones
	WMA	GLA	BG	GLA	BG
	1	6	1	2	4
	10	14	16	7	23
	3	6	8	7	15
	4	1	7	1	2
	3	5	6	4	3
	3	38	28	3	8
	7	15	11	27	13
	3	6	1	7	2
	3	22	9	2	2
	4	16	20	6	37
	1	6	7	2	3
	4	5	13	14	29
	5	5	4	3	5
	2	9	20	2	2
	10	30	20	16	42
	2	8	11	10	36
	2	10	38	52	49
	3	4	11	2	4
	1	6	11	4	7
	1	3	5	2	3
	1	6	1	5	7
	1	39	19	2	6
	1	29	5	2	16
	1	15	7	2	1
	2	32	14	1	3
	6	42	83	3	2
	1	4	1	1	2
	1	34	35	4	1
	1	1	2	11	9
	3	16	12	3	2
	7	47	53	25	36
	2	13	5	6	5
	2	19	40	4	1
	1	5	4	1	4
	2	9	12	4	13
	6	23	38	1	6
	2	42	76	4	16
	4	13	19	3	3
	4	5	10	1	1
	1	3	10	4	4
	1	2	1	5	4
	5	15	24	1	1
	2	5	8	1	8
	2	16	36	1	2
	10	19	14
	1	2	2
	7	50	77
	2	21	46
	5	11	18
	13	11	43
mean	3.38	15.28	19.24	6.09091	10.0455
std deviation	2.83484	13.245	20.0891	9.11125	12.5029
SEM	0.400907	1.87313	2.84103	1.37357	1.88489

## Sheet: Figure 3D
Contribution of astrocyte types to E14-P30 HetCs
	Triple clones			Double clones
	WMA	GLA	BG	GLA	BG
	1	2	4	7	3
	1	3	8	1	2
	6	12	7	1	4
	19	60	12	6	10
	1	7	8	1	5
	4	25	11	43	31
	2	1	4	1	3
	6	10	2	4	9
				7	9
				3	2
				6	7
				18	8
				3	11
mean	5	15	7	7.76923	8
std deviation	6.04743	19.7557	3.5051	11.5337	7.59386
SEM	2.13809	6.98468	1.23924	3.19887	2.10616

## Sheet: Figure 4A
M-L dispersion of StarTrack P30 clones
	All clones E12	All clones E14	HomCs E12	HomCs E14	HetCs E12	Hetcs E14
	50	50	50	50	150	50
	300	50	50	50	1250	50
	50	100	150	50	1150	100
	400	50	50	100	1600	50
	50	50	50	50	750	50
	50	50	50	50	950	350
	150	100	50	50	350	400
	50	50	50	50	1350	350
	50	150	50	50	100	200
	650	50	50	200	1550	350
	50	50	50	50	1150	450
	1250	50	50	50	150	50
	50	50	50	50	900	450
	200	50	400	150	1900	50
	50	50	50	50	350	50
	1150	50	100	50	1200	450
	50	200	50	50	1000	50
	1600	50	50	50	100	50
	750	50	150	50	500	200
	50	50	50	50	50	100
	950	50	50	50	1550	100
	200	50	50	50	100	150
	350	50	50	50	1600
	1350	50	50	50	1850
	300	50	50	100	950
	50	50	50	100	700
	50	50	50	50	1250
	50	50	50	50	800
	100	50	50	50	700
	50	50	50	50	900
	1550	350	250	50	300
	50	400	200	50	50
	1150	100	50	50	250
	50	450	100	50	1000
	50	50	50	50	1000
	50	50	50	50	50
	50	50	50	50	1850
	150	450	50	50	1150
	50	50	50	50	1750
	50	100	50	100	1900
	50	100	50	50	1150
	50	50	200	50	350
	50	50	50	50	100
	50	350	50	50	400
	50	50	50	50	1500
	50	50	50	50	50
	50	50	50	50	350
	50	450	50	50	350
	50	50	50	100	1050
	50	50	50	50	1700
	50	50	50	50	350
	50	50	100	50	550
	550	200	50	50	250
	50	50	50	100	150
	900	50	50	50	150
	1900	50	50	50	900
	350	200	50	100	150
	50	50	50	50	600
	1200	100	50	50	500
	50	350	50	50	1450
	350	50	50	50	100
	50	100	100	50	1300
	100	50	100	50	300
	50	50	50	50	50
	50	100	50	50	50
	50	50	50	400	150
	50	50	50	50	100
	50	50	50	50	350
	1200	50	50	50	700
	50	900	50	50	100
	50	50	50		400
	1850	50	50		150
	50	50	450		1150
	1650	50	50		300
	1000	50	50		200
	100	50	50		1050
	100	100	50		250
	50	50	550		50
	500	50	100		200
	50	50	50		1450
	50	50	50		50
	50	50	50		700
	50	100	50		50
	550	50	50		100
	50	50	50		50
	1550	100	350		800
	50	50	50		100
	100	250	50		400
	50	150	50		800
	50	50	50		150
	1600	50	50		100
	50	50	50		1800
	50	50	50		1050
	50	50	100		100
	50	50	100
	1850	50	150
	150	600	50
	50	50	50
	200	50	50
	50	400	50
	950	50	50
	50	50	50
	50		50
	700		50
	50		50
	1250		100
	800		50
	700		50
	100		50
	900		100
	50		50
	50		100
	300		50
	50		50
	50		50
	50		150
	50		50
	50		50
	400		50
	50		50
	250		50
	50		50
	100		50
	50		150
	50		50
	100		50
	50		50
	100		50
	50		150
	1000		50
	50		50
	1000		50
	50		50
	50		50
	400		50
	50		50
	50		750
	50		50
	50		50
	50		50
	1850		50
	50		50
	50		100
	1850		50
	1150		50
	1750		50
	50		50
	1900		100
	50		50
	50		50
	1150		50
	50		50
	350		50
	50
	50
	50
	50
	50
	50
	100
	50
	50
	100
	50
	50
	50
	400
	50
	50
	50
	1500
	50
	50
	1100
	350
	50
	350
	50
	100
	50
	1050
	300
	50
	50
	1700
	50
	50
	50
	350
	50
	150
	550
	250
	150
	150
	900
	150
	600
	500
	50
	1450
	100
	50
	1300
	300
	50
	50
	350
	150
	150
	100
	450
	350
	700
	100
	400
	150
	1150
	450
	300
	1450
	250
	200
	200
	1050
	2450
	50
	250
	50
	200
	100
	50
	100
	50
	1450
	50
	50
	700
	50
	50
	100
	1400
	50
	50
	350
	50
	50
	100
	50
	50
	150
	50
	150
	50
	50
	800
	50
	50
	300
	100
	400
	50
	400
	50
	50
	100
	100
	800
	50
	150
	100
	950
	50
	50
	150
	1800
	50
	50
	750
	50
	1050
	100
	50
	50
mean	332.042	104.902	76.1438	63.5714	669.149	186.364
std deviation	492.841	135.98	88.3111	48.0952	573.384	158.251
SEM	29.2447	13.464	7.13953	5.74847	59.14	33.7392

## Sheet: Figure 4B
M-L dispersion of StarTrack P30 HetCs
	BG+GL+WM clones E12	BG+GL+WM clones E14	BG+GL clones E12	BG+GL clones E14
	150	100	1250	50
	1600	350	1150	50
	950	400	750	50
	350	350	100	50
	1350	200	150	450
	1550	350	900	50
	1150	100	350	450
	1900	150	500	50
	1200		50	50
	1000		1550	450
	100		100	50
	1600		1850	50
	950		50	200
	700		50	100
	1250		1150
	800		100
	700		1500
	900		50
	300		350
	250		350
	1000		150
	1000		150
	1850		150
	1150		600
	1750		100
	1900		50
	350		50
	400		150
	350		100
	1050		1150
	1700		300
	550		200
	250		250
	900		50
	500		200
	1450		50
	1300		700
	300		50
	350		50
	700		100
	100		400
	400		150
	150		100
	1050		100
	1450
	100
	800
	800
	1050
	1800
mean	905	250	401.136	150
std deviation	546.534	125.357	482.181	167.562
SEM	77.2915	44.3203	72.6915	44.7827

## Sheet: Figure 4C
Correlation M-L dispersion-size E12-P30 clones
	Clone size	Mediolateral dispersion
	1	50
	4	150
	2	50
	1	50
	8	150
	1	50
	1	50
	6	1250
	1	50
	2	50
	2	50
	1	50
	2	50
	30	1150
	40	1600
	22	750
	17	950
	12	350
	14	1350
	3	100
	2	100
	69	1550
	33	1150
	3	50
	2	50
	7	150
	2	50
	11	900
	10	1900
	1	50
	1	50
	1	50
	40	350
	2	50
	2	50
	2	50
	34	1200
	6	200
	31	1850
	44	1650
	4	400
	40	1000
	1	50
	14	100
	9	500
	4	50
	1	50
	43	1550
	7	50
	5	100
	2	50
	22	1600
	1	50
	2	100
	43	1850
	13	50
	1	50
	14	950
	31	700
	60	1250
	21	800
	1	50
	50	700
	18	900
	21	50
	1	50
	3	100
	2	150
	1	50
	18	300
	2	100
	1	50
	1	50
	10	50
	8	50
	2	50
	1	50
	2	50
	9	250
	1	50
	1	50
	8	1000
	59	1000
	4	50
	1	50
	3	50
	1	50
	1	50
	1	50
	1	50
	1	50
	1	50
	104	1850
	35	1850
	23	1150
	2	50
	48	1750
	131	1900
	1	50
	2	50
	58	1150
	6	350
	8	450
	46	100
	70	400
	1	50
	3	50
	1	50
	1	50
	101	1500
	1	50
	6	50
	1	50
	2	250
	2	200
	1	50
	1	50
	4	350
	11	350
	31	1050
	2	50
	1	50
	1	50
	107	1700
	5	350
	20	550
	2	550
	2	100
	2	50
	2	50
	2	100
	1	50
	1	50
	61	250
	12	150
	8	150
	10	900
	1	50
	18	150
	3	600
	1	50
	23	500
	6	350
	67	1450
	1	50
	1	50
	4	100
	120	1300
	2	50
	1	50
	36	300
	1	50
	5	50
	2	50
	1	50
	2	50
	3	50
	1	50
	2	50
	1	50
	1	50
	5	150
	1	50
	4	100
	20	100
	1	100
	5	50
	2	50
	7	150
	1	50
	1	50
	2	100
	5	50
	2	50
	1	50
	2	50
	1	50
	1	50
	19	350
	14	700
	5	50
	7	150
	1	50
	1	50
	4	100
	1	50
	3	50
	5	50
	44	400
	2	50
	1	50
	1	50
	15	150
	5	1150
	61	300
	2	50
	91	1450
	11	200
	5	100
	54	1050
	69	2450
	1	50
	5	250
	5	50
	17	200
	1	50
	43	1450
	1	50
	7	50
	20	700
	1	50
	2	50
	1	50
	3	100
	2	50
	6	50
	2	100
	1	50
	5	100
	7	100
	47	1400
	1	50
	1	50
	2	50
	134	800
	8	100
	2	50
	1	50
	1	50
	2	150
	9	400
	1	50
	1	50
	69	800
	2	150
	1	50
	1	50
	3	750
	1	50
	9	100
	3	50
	2	50
	2	50
	37	950
	34	1050
	1	50
	67	1800
	1	50
	2	50
	1	50
	4	150
	2	50
	3	100
	1	50

## Sheet: Figure 4D
Correlation M-L dispersion-size E14-P30 clones
	Clone size	Mediolateral dispersion
	1	50
	10	50
	7	100
	1	50
	2	50
	1	50
	5	100
	2	50
	3	150
	4	50
	2	50
	1	50
	1	50
	2	50
	1	50
	2	50
	5	200
	3	50
	1	50
	1	50
	1	50
	5	50
	6	50
	3	50
	1	50
	1	50
	4	50
	12	350
	25	400
	16	450
	1	50
	6	50
	3	50
	74	450
	1	50
	3	100
	2	100
	3	50
	4	50
	91	350
	1	50
	1	50
	13	50
	16	450
	3	50
	5	50
	1	50
	1	50
	16	200
	1	50
	4	50
	13	50
	26	200
	3	50
	14	100
	40	350
	1	50
	7	100
	1	50
	1	50
	4	100
	1	50
	1	50
	1	50
	2	50
	4	50
	2	50
	1	50
	1	50
	1	50
	2	100
	2	50
	1	50
	1	50
	2	50
	2	50
	2	100
	1	50
	1	50
	4	100
	1	50
	18	150
	1	50
	2	50
	1	50
	3	50
	1	50
	1	50
	1	50
	4	400
	1	50
	2	50

## Sheet: Figure 5A
Cumulative proportions of intra-cluster, cell-to-cell Nearest Neighbor Distance (NND)
frequencies						normalized distances (um)
Double		Triple		Triple no WMA		Double		Triple		Triple no WMA
Data	Random	Data	Random	Data	Random	Data	Random	Data	Random	Data	Random
0.0883055	0	0.0484454	0	0.0632203	0	88.3055	0	48.4454	0	63.2203	0
0.288783	0	0.154495	0.00024108	0.206783	0	288.783	0	154.495	0.24108	206.783	0
0.437947	0	0.248253	0.00144648	0.332236	0.000988142	437.947	0	248.253	1.44648	332.236	0
0.560859	0	0.325621	0.00409836	0.433981	0.00362319	560.859	0	325.621	4.09836	433.981	0
0.721957	0	0.411424	0.0096432	0.549555	0.00823452	721.957	0	411.424	9.6432	549.555	0
0.801909	0	0.480598	0.0161524	0.644386	0.0131752	801.909	0	480.598	16.1524	644.386	0
0.831742	0.00119474	0.534828	0.0257956	0.713204	0.0256917	831.742	1.19474	534.828	25.7956	713.204	1194.74
0.859189	0.00716846	0.58014	0.0458052	0.771814	0.0431489	859.189	7.16846	580.14	45.8052	771.814	7168.46
0.881862	0.0143369	0.620631	0.0665381	0.817583	0.0629117	881.862	14.3369	620.631	66.5381	817.583	14336.9
0.899761	0.0238949	0.665221	0.0894407	0.870267	0.0902503	899.761	23.8949	665.221	89.4407	870.267	23894.9
0.920048	0.037037	0.691251	0.119817	0.894633	0.117589	920.048	37.037	691.251	119.817	894.633	37037
0.928401	0.046595	0.710533	0.155979	0.906816	0.154809	928.401	46.595	710.533	155.979	906.816	46595
0.937947	0.0585424	0.731502	0.197445	0.91867	0.19137	937.947	58.5424	731.502	197.445	918.67	58542.4
0.945107	0.0728793	0.750542	0.238428	0.924597	0.233202	945.107	72.8793	750.542	238.428	924.597	72879.3
0.951074	0.088411	0.766932	0.282787	0.931182	0.279644	951.074	88.411	766.932	282.787	931.182	88411
0.953461	0.107527	0.784044	0.329556	0.937438	0.329051	953.461	107.527	784.044	329.556	937.438	107527
0.958234	0.132616	0.79706	0.384282	0.942707	0.381423	958.234	132.616	797.06	384.282	942.707	132616
0.966587	0.151732	0.805495	0.438042	0.946329	0.434453	966.587	151.732	805.495	438.042	946.329	151732
0.973747	0.172043	0.817546	0.489634	0.950609	0.487154	973.747	172.043	817.546	489.634	950.609	172043
0.97494	0.199522	0.826946	0.537608	0.952256	0.527009	974.94	199.522	826.946	537.608	952.256	199522
0.977327	0.224612	0.835382	0.580762	0.95456	0.563241	977.327	224.612	835.382	580.762	954.56	224612
0.97852	0.241338	0.846469	0.620058	0.956865	0.604084	978.52	241.338	846.469	620.058	956.865	241338
0.984487	0.280765	0.858038	0.657184	0.960487	0.641963	984.487	280.765	858.038	657.184	960.487	280765
0.986874	0.311828	0.868643	0.694552	0.96378	0.67556	986.874	311.828	868.643	694.552	963.78	311828
0.98926	0.344086	0.876838	0.724928	0.965097	0.709486	989.26	344.086	876.838	724.928	965.097	344086
0.990453	0.375149	0.884068	0.749518	0.966743	0.742424	990.453	375.149	884.068	749.518	966.743	375149
0.990453	0.409797	0.888407	0.773626	0.967731	0.766798	990.453	409.797	888.407	773.626	967.731	409797
0.991647	0.44325	0.892986	0.798216	0.969707	0.788538	991.647	443.25	892.986	798.216	969.707	443250
0.994033	0.477897	0.896602	0.821601	0.970036	0.814229	994.033	477.897	896.602	821.601	970.036	477897
0.995227	0.504182	0.900699	0.835342	0.971024	0.833663	995.227	504.182	900.699	835.342	971.024	504182
0.995227	0.545998	0.90335	0.850289	0.97267	0.849144	995.227	545.998	903.35	850.289	972.67	545998
0.995227	0.571087	0.907448	0.864513	0.973658	0.861001	995.227	571.087	907.448	864.513	973.658	571087
0.995227	0.600956	0.910099	0.879219	0.974646	0.874506	995.227	600.956	910.099	879.219	974.646	600956
0.995227	0.617682	0.913232	0.890068	0.975305	0.886034	995.227	617.682	913.232	890.068	975.305	617682
0.995227	0.643967	0.91516	0.897782	0.976292	0.895916	995.227	643.967	915.16	897.782	976.292	643967
0.995227	0.670251	0.917329	0.909354	0.97728	0.903821	995.227	670.251	917.329	909.354	977.28	670251
0.99642	0.692951	0.919017	0.914899	0.977939	0.911397	996.42	692.951	919.017	914.899	977.939	692951
0.99642	0.707288	0.919499	0.921649	0.977939	0.918314	996.42	707.288	919.499	921.649	977.939	707288
0.99642	0.72282	0.920945	0.926712	0.978268	0.924572	996.42	722.82	920.945	926.712	978.268	722820
0.99642	0.74313	0.921909	0.931774	0.978927	0.930501	996.42	743.13	921.909	931.774	978.927	743130
0.99642	0.758662	0.922391	0.936355	0.978927	0.933136	996.42	758.662	922.391	936.355	978.927	758662
0.997613	0.772999	0.923355	0.941176	0.978927	0.938406	997.613	772.999	923.355	941.176	978.927	772999
0.997613	0.786141	0.923837	0.945757	0.979256	0.942688	997.613	786.141	923.837	945.757	979.256	786141
0.997613	0.799283	0.925283	0.948409	0.980573	0.945652	997.613	799.283	925.283	948.409	980.573	799283
0.997613	0.81362	0.926006	0.951302	0.981231	0.949275	997.613	813.62	926.006	951.302	981.231	813620
0.997613	0.821983	0.926006	0.9554	0.981231	0.954216	997.613	821.983	926.006	955.4	981.231	821983
0.997613	0.830346	0.926006	0.958775	0.981231	0.95751	997.613	830.346	926.006	958.775	981.231	830346
0.997613	0.835125	0.926247	0.960463	0.981561	0.959486	997.613	835.125	926.247	960.463	981.561	835125
0.997613	0.845878	0.926488	0.962633	0.98189	0.962451	997.613	845.878	926.488	962.633	981.89	845878
0.997613	0.857826	0.92697	0.963838	0.98189	0.965086	997.613	857.826	926.97	963.838	981.89	857826
0.997613	0.866189	0.927452	0.965526	0.98189	0.967721	997.613	866.189	927.452	965.526	981.89	866189
0.997613	0.874552	0.928416	0.967213	0.98189	0.969038	997.613	874.552	928.416	967.213	981.89	874552
0.997613	0.878136	0.929622	0.968901	0.98189	0.969368	997.613	878.136	929.622	968.901	981.89	878136
0.997613	0.885305	0.930586	0.969624	0.982549	0.971673	997.613	885.305	930.586	969.624	982.549	885305
0.997613	0.893668	0.931791	0.971311	0.982549	0.972991	997.613	893.668	931.791	971.311	982.549	893668
0.998807	0.899642	0.932996	0.97324	0.982878	0.973979	998.807	899.642	932.996	973.24	982.878	899642
1	0.9092	0.934924	0.974204	0.983536	0.974967	1000	909.2	934.924	974.204	983.536	909200
1	0.912784	0.936611	0.97541	0.984524	0.975626	1000	912.784	936.611	975.41	984.524	912784
1	0.915173	0.937575	0.976615	0.985183	0.976285	1000	915.173	937.575	976.615	985.183	915173
1	0.919952	0.938539	0.978303	0.985512	0.977273	1000	919.952	938.539	978.303	985.512	919952
1	0.921147	0.939986	0.979749	0.985841	0.97859	1000	921.147	939.986	979.749	985.841	921147
1	0.927121	0.94095	0.980714	0.985841	0.97892	1000	927.121	940.95	980.714	985.841	927121
1	0.930705	0.94336	0.981437	0.9865	0.979578	1000	930.705	943.36	981.437	986.5	930705
1	0.9319	0.946734	0.981919	0.9865	0.981225	1000	931.9	946.734	981.919	986.5	931900
1	0.9319	0.94818	0.98216	0.9865	0.982213	1000	931.9	948.18	982.16	986.5	931900
1	0.936679	0.949626	0.982642	0.9865	0.982872	1000	936.679	949.626	982.642	986.5	936679
1	0.936679	0.952519	0.983848	0.9865	0.98386	1000	936.679	952.519	983.848	986.5	936679
1	0.936679	0.954206	0.98433	0.986829	0.985507	1000	936.679	954.206	984.33	986.829	936679
1	0.936679	0.955652	0.985053	0.986829	0.986495	1000	936.679	955.652	985.053	986.829	936679
1	0.939068	0.958062	0.985053	0.986829	0.986495	1000	939.068	958.062	985.053	986.829	939068
1	0.942652	0.959508	0.985294	0.986829	0.987154	1000	942.652	959.508	985.294	986.829	942652
1	0.945042	0.960954	0.986017	0.987158	0.987484	1000	945.042	960.954	986.017	987.158	945042
1	0.949821	0.961919	0.986741	0.987158	0.988142	1000	949.821	961.919	986.741	987.158	949821
1	0.95221	0.962401	0.987946	0.987158	0.988142	1000	952.21	962.401	987.946	987.158	952210
1	0.9546	0.962642	0.988669	0.987158	0.988801	1000	954.6	962.642	988.669	987.158	954600
1	0.9546	0.963124	0.989392	0.987158	0.98946	1000	954.6	963.124	989.392	987.158	954600
1	0.956989	0.963124	0.989392	0.987158	0.989789	1000	956.989	963.124	989.392	987.158	956989
1	0.956989	0.963124	0.989634	0.987158	0.989789	1000	956.989	963.124	989.634	987.158	956989
1	0.958184	0.963847	0.990357	0.987158	0.990119	1000	958.184	963.847	990.357	987.158	958184
1	0.958184	1	0.990598	1	0.990448	1000	958.184	1000	990.598	1000	958184

## Sheet: Figure 5E,F,G,H
Number of subclones comprising both BG and GLA with defined BG:GLA ratios
	Panel E		Panel F		Panel G		Panel H
	Double clones (BG+GLA)		Triple clones (BG+GLA+WMA)		Triple clones (BG+GLA+WMA, WMA excl)		Triple clones (BG+GLA)
	Values	Descriptors	Values	Descriptors	Values	Descriptors	Values	Descriptors
	0	N=55	0	N=49	0	N=53	0	N=58
	0	Mean=0.572	0	Mean=0.072	1	Mean=-0.038	1	Mean=0.270
	0	LowCi=0.372	8	LowCi=-0.354	10	LowCi=-0.332	5	LowCi=0.045
	8	HighCi=0.783	10	HighCi=0.211	9	HighCi=0.218	4	HighCi=0.472
	12		11		11		18
	24		16		16		24
	9		4		6		6
	2		0		0		0
	0		0		0		0
	0		0		0		0
	Ci= confidence interval of the mean

[truncated: 33 more sheets: Figure 6D, Figure 6E, Figure  7G, Figure 7H, Figure 8A, Figure 8E, Figure 9B, Figure 9C, Figure 9D, Figure 9E, Figure 9F, Figure 9G, Figure S3A, Figure S3B, Fig S4A, Fig S4B, Figure S5A, Figure S5B, Figure S5E, Figure S5F …]
